# Supplementary material for: Greenhouse Gas Emission and Water Footprint of the National Diet in Turkey: Results from Turkey Nutrition and Health Survey 2017
Source: MDPI journal article supplement (doi:10.3390/su15129768), 2023-06-19
Supplement: s1 [file s1]

Table S1. Diet quality index (DQI) and dietary diversity score of individuals.

|                                                           | Men (n=6297)     | Women (n=6230)   | Total<br>(n=12527) | p-value      |
|-----------------------------------------------------------|------------------|------------------|--------------------|--------------|
| <b>Diet quality index total score</b>                     | 62.18±8.31       | 62.34±8.25       | 62.26±8.28         | 0.27         |
| <b>DQI variety score</b>                                  | 18.42±2.27       | 18.51±2.23       | 18.46±2.24         | <b>0.018</b> |
| Food group variety                                        | 13.86±1.67       | 13.94±1.64       | 13.9±1.66          | <b>0.005</b> |
| Protein source variety                                    | 4.56±0.1         | 4.57±0.97        | 4.57±0.98          | 0.493        |
| <b>DQI adequacy score</b>                                 | 30.03±5.31       | 30.17±5.18       | 30.1±5.24          | 0.144        |
| Vegetable group                                           | 2.7±1.86         | 2.72±1.72        | 2.71±1.79          | 0.49         |
| Fruit group                                               | 2.04±1.87        | 2.12±1.86        | 2.08±1.87          | <b>0.022</b> |
| Cereal group                                              | 3.13±1.29        | 3.08±1.28        | 3.1±1.29           | <b>0.046</b> |
| Fiber                                                     | 4.38±0.92        | 4.39±0.91        | 4.39±0.91          | 0.33         |
| Protein                                                   | 4.99±0.08        | 4.99±0.86        | 4.99±0.82          | 0.8          |
| Iron                                                      | 4.78±0.58        | 4.79±0.57        | 4.78±0.58          | 0.6          |
| Calcium                                                   | 3.86±1.17        | 3.86±1.17        | 3.86±1.17          | 0.79         |
| Vitamin C                                                 | 4.16±1.29        | 4.22±1.23        | 4.19±1.26          | <b>0.011</b> |
| <b>DQI moderation score</b>                               | 12.32±5.56       | 12.32±5.69       | 12.32±5.62         | 0.99         |
| Total fat                                                 | 1.43±1.89        | 1.36±1.84        | 1.4±1.85           | <b>0.035</b> |
| Saturated fat                                             | 1.44±2.04        | 1.42±2.02        | 1.43±2.03          | 0.69         |
| Cholesterol                                               | 4.67±2.17        | 4.72±2.16        | 4.69±2.17          | 0.17         |
| Sodium                                                    | 2.23±2.39        | 2.27±2.38        | 2.25±2.39          | 0.26         |
| Empty calorie foods                                       | 2.55±2.22        | 2.54±2.24        | 2.54±2.23          | 0.66         |
| <b>DQI overall balance score</b>                          | 1.41±2.05        | 1.34±1.91        | 1.38±1.98          | <b>0.049</b> |
| Macronutrient ratio                                       | 0.49±1.37        | 0.44±1.31        | 0.46±1.34          | <b>0.039</b> |
| Fatty acid ratio                                          | 0.92±1.47        | 0.9±1.46         | 0.91±1.46          | 0.45         |
| <b>Dietary diversity score</b>                            | 6.65±1.32        | 6.67±1.31        | 6.66±1.31          | 0.57         |
| Cereals                                                   | 1.0±0.05 [99.8]  | 1.0±0.04 [99.8]  | 0.99±0.43 [99.8]   | 0.42         |
| Dark green leafy vegetables<br>and vitamin A-rich sources | 0.39±0.49 [38.6] | 0.39±0.49 [38.7] | 0.39±0.49 [38.7]   | 0.12         |
| Other fruits                                              | 0.61±0.49 [61.0] | 0.63±0.48 [63.1] | 0.62±0.49 [62.1]   | <b>0.017</b> |
| Other vegetables                                          | 0.96±0.19 [96.3] | 0.97±0.18 [96.6] | 0.96±0.19 [96.4]   | 0.249        |
| Legumes, nuts, and seeds                                  | 0.45±0.5 [44.7]  | 0.46±0.5 [45.7]  | 0.45±0.5 [45.2]    | 0.285        |
| Meats                                                     | 0.79±0.4 [79.4]  | 0.78±0.41 [78.4] | 0.79±0.41 [78.9]   | 0.187        |
| Milk and milk products                                    | 0.95±0.21 [95.4] | 0.96±0.19 [96.2] | 0.96±0.36 [95.8]   | <b>0.027</b> |
| Eggs                                                      | 0.65±0.48 [64.8] | 0.63±0.48 [63.2] | 0.64±0.48 [64.0]   | 0.062        |
| Oils and fats                                             | 0.85±0.35 [85.3] | 0.85±0.36 [84.8] | 0.85±0.36 [85.1]   | 0.445        |

p-values calculated with the independent samples t-test. Bold type indicates statistical significance ( $p < 0.05$ ). Values are mean ± SD or mean ± SD [%]

Table S2a. Energy and nutrients intake, RDA (%), DQI, dietary diversity score by GHGEs, and total water footprint tertiles, among 6230 women

|                                |                           | GHGEs                      |                            |                            | p1               | Total water footprint      |                            |                            | p2               |
|--------------------------------|---------------------------|----------------------------|----------------------------|----------------------------|------------------|----------------------------|----------------------------|----------------------------|------------------|
|                                |                           | Q1                         | Q2                         | Q3                         |                  | Q1                         | Q2                         | Q3                         |                  |
| Cut-off                        |                           | ≤2.083                     | 2.083-3.516                | ≥3.516                     |                  | ≤2115.4                    | 2115.4-3121.4              | ≥3121.4                    |                  |
| Energy (kcal)                  |                           | 1460.1±528.82 <sup>a</sup> | 1846.3±589.98 <sup>b</sup> | 2231.1±711.22 <sup>c</sup> | <b>&lt;0.001</b> | 1312.6±419.99 <sup>a</sup> | 1808.1±499.78 <sup>b</sup> | 2373.5±684.03 <sup>c</sup> | <b>&lt;0.001</b> |
|                                | RDA (%)                   | 71.2±26.27 <sup>a</sup>    | 89.9±29.36 <sup>b</sup>    | 108.8±35.65 <sup>c</sup>   | <b>&lt;0.001</b> | 64.2±21.24 <sup>a</sup>    | 88.0±25.18 <sup>b</sup>    | 115.6±34.36 <sup>c</sup>   | <b>&lt;0.001</b> |
| Carbohydrate (%)               |                           | 50.3±9.69 <sup>a</sup>     | 47.3±9.08 <sup>b</sup>     | 44.9±8.59 <sup>c</sup>     | <b>&lt;0.001</b> | 50.1±9.98 <sup>a</sup>     | 47.5±8.98 <sup>b</sup>     | 45.1±8.65 <sup>c</sup>     | <b>&lt;0.001</b> |
| Protein (%)                    |                           | 18.6±6.48 <sup>a</sup>     | 20.0±6.57 <sup>b</sup>     | 21.3±6.81 <sup>c</sup>     | <b>&lt;0.001</b> | 18.8±6.53 <sup>a</sup>     | 19.9±6.59 <sup>b</sup>     | 21.1±6.84 <sup>c</sup>     | <b>&lt;0.001</b> |
|                                | RDA (%)                   | 100.0±57.34 <sup>a</sup>   | 137.7±76.32 <sup>b</sup>   | 169.9±90.41 <sup>c</sup>   | <b>&lt;0.001</b> | 89.3±49.52 <sup>a</sup>    | 130.9±67.91 <sup>b</sup>   | 179.9±91.48 <sup>c</sup>   | <b>&lt;0.001</b> |
| Fat (%)                        |                           | 31.1±8.63 <sup>a</sup>     | 32.8±7.80 <sup>b</sup>     | 33.8±7.42 <sup>c</sup>     | <b>&lt;0.001</b> | 31.2±8.70 <sup>a</sup>     | 32.6±7.79 <sup>b</sup>     | 33.8±7.47 <sup>c</sup>     | <b>&lt;0.001</b> |
| Fiber (g)                      |                           | 19.8±8.55 <sup>a</sup>     | 22.6±9.24 <sup>b</sup>     | 24.5±9.88 <sup>c</sup>     | <b>&lt;0.001</b> | 18.0±7.65 <sup>a</sup>     | 22.4±8.43 <sup>b</sup>     | 26.1±10.33 <sup>c</sup>    | <b>&lt;0.001</b> |
|                                | RDA (%)                   | 83.5±37.20 <sup>a</sup>    | 95.0±39.53 <sup>b</sup>    | 103.1±42.54 <sup>c</sup>   | <b>&lt;0.001</b> | 76.2±33.30 <sup>a</sup>    | 94.2±36.89 <sup>b</sup>    | 109.5±44.08 <sup>c</sup>   | <b>&lt;0.001</b> |
| Iron (mg)                      |                           | 12.6±19.75 <sup>a</sup>    | 15.3±8.27 <sup>b</sup>     | 19.2±10.68 <sup>c</sup>    | <b>&lt;0.001</b> | 11.6±20.50 <sup>a</sup>    | 15.1±7.71 <sup>b</sup>     | 20.2±10.80 <sup>c</sup>    | <b>&lt;0.001</b> |
|                                | RDA (%)                   | 85.3±115.97 <sup>a</sup>   | 103.1±62.73 <sup>b</sup>   | 129.5±80.84 <sup>c</sup>   | <b>&lt;0.001</b> | 79.2±118.81 <sup>a</sup>   | 101.3±60.34 <sup>b</sup>   | 135.6±81.81 <sup>c</sup>   | <b>&lt;0.001</b> |
| Calcium (mg)                   |                           | 949.9±509.85 <sup>a</sup>  | 1173.0±615.45 <sup>b</sup> | 1314.3±665.45 <sup>c</sup> | <b>&lt;0.001</b> | 875.1±464.51 <sup>a</sup>  | 1147.7±564.83 <sup>b</sup> | 1390.2±694.20 <sup>c</sup> | <b>&lt;0.001</b> |
|                                | RDA (%)                   | 88.1±48.46 <sup>a</sup>    | 108.6±58.15 <sup>b</sup>   | 122.1±63.38 <sup>c</sup>   | <b>&lt;0.001</b> | 81.0±44.26 <sup>a</sup>    | 106.7±54.16 <sup>b</sup>   | 128.8±65.48 <sup>c</sup>   | <b>&lt;0.001</b> |
| Vitamin C (mg)                 |                           | 108.5±89.41 <sup>a</sup>   | 122.5±96.96 <sup>b</sup>   | 130.7±101.23 <sup>c</sup>  | <b>&lt;0.001</b> | 106.8±94.29 <sup>a</sup>   | 120.9±88.54 <sup>b</sup>   | 132.6±105.00 <sup>c</sup>  | <b>&lt;0.001</b> |
|                                | RDA (%)                   | 123.2±102.88 <sup>a</sup>  | 139.3±109.51 <sup>b</sup>  | 148.6±115.79 <sup>c</sup>  | <b>&lt;0.001</b> | 121.4±108.00 <sup>a</sup>  | 137.3±100.31 <sup>b</sup>  | 151.0±120.10 <sup>c</sup>  | <b>&lt;0.001</b> |
| Saturated fat (g)              |                           | 16.3±7.86 <sup>a</sup>     | 23.3±9.90 <sup>b</sup>     | 30.4±12.01 <sup>c</sup>    | <b>&lt;0.001</b> | 15.0±7.15 <sup>a</sup>     | 22.4±8.38 <sup>b</sup>     | 31.9±12.05 <sup>c</sup>    | <b>&lt;0.001</b> |
| Cholesterol (mg)               |                           | 161.6±128.80 <sup>a</sup>  | 241.7±150.24 <sup>b</sup>  | 317.4±187.93 <sup>c</sup>  | <b>&lt;0.001</b> | 145.4±116.97 <sup>a</sup>  | 227.3±128.75 <sup>b</sup>  | 341.1±195.04 <sup>c</sup>  | <b>&lt;0.001</b> |
| Diet quality index total score |                           | 62.7±8.58 <sup>a</sup>     | 63.0±8.02 <sup>a</sup>     | 61.3±8.05 <sup>b</sup>     | <b>&lt;0.001</b> | 62.4±8.52 <sup>a</sup>     | 63.3±8.07 <sup>b</sup>     | 61.2±8.06 <sup>c</sup>     | <b>&lt;0.001</b> |
|                                | DQI variety score         | 17.6±2.93 <sup>a</sup>     | 19.0±1.62 <sup>b</sup>     | 19.0±1.55 <sup>b</sup>     | <b>&lt;0.001</b> | 17.5±2.98 <sup>a</sup>     | 18.9±1.69 <sup>b</sup>     | 19.0±1.56 <sup>b</sup>     | <b>&lt;0.001</b> |
|                                | DQI adequacy score        | 28.3±5.55 <sup>a</sup>     | 30.6±4.72 <sup>b</sup>     | 31.6±4.65 <sup>c</sup>     | <b>&lt;0.001</b> | 27.5±5.51 <sup>a</sup>     | 30.6±4.56 <sup>b</sup>     | 32.0±4.51 <sup>c</sup>     | <b>&lt;0.001</b> |
|                                | DQI moderation score      | 15.3±5.22 <sup>a</sup>     | 12.1±5.00 <sup>b</sup>     | 9.5±5.30 <sup>c</sup>      | <b>&lt;0.001</b> | 15.9±5.09 <sup>a</sup>     | 12.4±4.73 <sup>b</sup>     | 9.0±5.18 <sup>c</sup>      | <b>&lt;0.001</b> |
|                                | DQI overall balance score | 1.55±2.05 <sup>a</sup>     | 1.32±1.89 <sup>b</sup>     | 1.16±1.74 <sup>c</sup>     | <b>&lt;0.001</b> | 1.51±2.03 <sup>a</sup>     | 1.34±1.91 <sup>b</sup>     | 1.19±1.76 <sup>c</sup>     | <b>&lt;0.001</b> |
| Dietary diversity score        |                           | 6.1±1.38 <sup>a</sup>      | 6.94±1.17 <sup>b</sup>     | 7.0±1.14 <sup>b</sup>      | <b>&lt;0.001</b> | 5.96±1.36 <sup>a</sup>     | 6.86±1.16 <sup>b</sup>     | 7.09±1.15 <sup>c</sup>     | <b>&lt;0.001</b> |

p-values calculated with one-way analysis of variance (ANOVA) test.

<sup>a,b,c</sup> Values on the same row not sharing the same superscript letters were significantly different and bold type used for impression (p<0.05). p1: GHGEs, p2: Total water footprint.

Abbreviations: Q: tertiles (Q1 is the lowest and Q3 is the highest); GHGEs: greenhouse gas emission; RDA: recommended dietary allowance; DQI: diet quality index.

Table S2b. Energy and nutrients intake, RDA (%), DQI, dietary diversity score by GHGEs, and total water footprint tertiles, among 6297 men

|                                |                           | GHGEs                      |                            |                            | p1               | Total water footprint      |                            |                            | p2               |
|--------------------------------|---------------------------|----------------------------|----------------------------|----------------------------|------------------|----------------------------|----------------------------|----------------------------|------------------|
|                                |                           | Q1                         | Q2                         | Q3                         |                  | Q1                         | Q2                         | Q3                         |                  |
| Cut-off                        |                           | ≤2.083                     | 2.083-3.516                | ≥3.516                     |                  | ≤2115.4                    | 2115.4-3121.4              | ≥3121.4                    |                  |
| Energy (kcal)                  |                           | 1482.1±520.79 <sup>a</sup> | 1891.9±633.91 <sup>b</sup> | 2243.7±731.66 <sup>c</sup> | <b>&lt;0.001</b> | 1327.9±438.93 <sup>a</sup> | 1814.9±492.75 <sup>b</sup> | 2391.8±716.33 <sup>c</sup> | <b>&lt;0.001</b> |
|                                | RDA (%)                   | 57.7±21.42 <sup>a</sup>    | 73.1±25.62 <sup>b</sup>    | 87.1±29.81 <sup>c</sup>    | <b>&lt;0.001</b> | 51.5±17.68 <sup>a</sup>    | 70.5±20.84 <sup>b</sup>    | 92.7±29.33 <sup>c</sup>    | <b>&lt;0.001</b> |
| Carbohydrate (%)               |                           | 50.7±9.77 <sup>a</sup>     | 47.4±9.12 <sup>b</sup>     | 45.0±8.82 <sup>c</sup>     | <b>&lt;0.001</b> | 50.4±10.18 <sup>a</sup>    | 47.8±9.10 <sup>b</sup>     | 45.4±8.81 <sup>c</sup>     | <b>&lt;0.001</b> |
| Protein (%)                    |                           | 18.2±6.62 <sup>a</sup>     | 20.0±6.86 <sup>b</sup>     | 21.6±7.20 <sup>c</sup>     | <b>&lt;0.001</b> | 18.7±6.73 <sup>a</sup>     | 19.8±6.85 <sup>b</sup>     | 21.4±7.19 <sup>c</sup>     | <b>&lt;0.001</b> |
|                                | RDA (%)                   | 99.8±59.26 <sup>a</sup>    | 134.0±73.02 <sup>b</sup>   | 168.4±90.89 <sup>c</sup>   | <b>&lt;0.001</b> | 90.1±48.91 <sup>a</sup>    | 131.2±68.77 <sup>b</sup>   | 177.1±92.49 <sup>c</sup>   | <b>&lt;0.001</b> |
| Fat (%)                        |                           | 30.9±8.46 <sup>a</sup>     | 32.5±7.79 <sup>b</sup>     | 33.4±7.79 <sup>c</sup>     | <b>&lt;0.001</b> | 30.9±8.58 <sup>a</sup>     | 32.5±7.94 <sup>b</sup>     | 33.2±7.66 <sup>c</sup>     | <b>&lt;0.001</b> |
| Fiber (g)                      |                           | 19.5±8.36 <sup>a</sup>     | 23.1±10.38 <sup>b</sup>    | 24.7±10.40 <sup>c</sup>    | <b>&lt;0.001</b> | 18.2±8.67 <sup>a</sup>     | 22.2±8.49 <sup>b</sup>     | 26.2±11.01 <sup>c</sup>    | <b>&lt;0.001</b> |
|                                | RDA (%)                   | 67.2±28.84 <sup>a</sup>    | 79.7±35.80 <sup>b</sup>    | 85.1±35.87 <sup>c</sup>    | <b>&lt;0.001</b> | 62.8±29.89 <sup>a</sup>    | 76.5±29.27 <sup>b</sup>    | 90.4±37.96 <sup>c</sup>    | <b>&lt;0.001</b> |
| Iron (mg)                      |                           | 11.7±6.46 <sup>a</sup>     | 15.5±8.67 <sup>b</sup>     | 18.9±16.07 <sup>c</sup>    | <b>&lt;0.001</b> | 10.8±5.94 <sup>a</sup>     | 14.7±7.46 <sup>b</sup>     | 20.0±10.18 <sup>c</sup>    | <b>&lt;0.001</b> |
|                                | RDA (%)                   | 117.3±64.56 <sup>a</sup>   | 155.3±86.71 <sup>b</sup>   | 189.2±98.04 <sup>c</sup>   | <b>&lt;0.001</b> | 107.9±59.36 <sup>a</sup>   | 147.5±74.64 <sup>b</sup>   | 199.5±101.78 <sup>c</sup>  | <b>&lt;0.001</b> |
| Calcium (mg)                   |                           | 941.4±503.38 <sup>a</sup>  | 1192.6±643.58 <sup>b</sup> | 1333.2±696.57 <sup>c</sup> | <b>&lt;0.001</b> | 887.2±490.20 <sup>a</sup>  | 1121.0±564.81 <sup>b</sup> | 1417.9±721.83 <sup>c</sup> | <b>&lt;0.001</b> |
|                                | RDA (%)                   | 87.2±46.92 <sup>a</sup>    | 111.3±62.21 <sup>b</sup>   | 123.5±66.29 <sup>c</sup>   | <b>&lt;0.001</b> | 82.5±46.60 <sup>a</sup>    | 109.8±53.41 <sup>b</sup>   | 132.0±69.27 <sup>c</sup>   | <b>&lt;0.001</b> |
| Vitamin C (mg)                 |                           | 105.8±98.46 <sup>a</sup>   | 129.3±128.83 <sup>b</sup>  | 131.9±103.77 <sup>b</sup>  | <b>&lt;0.001</b> | 108.1±126.39 <sup>a</sup>  | 119.2±96.11 <sup>b</sup>   | 137.5±111.99 <sup>c</sup>  | <b>&lt;0.001</b> |
|                                | RDA (%)                   | 120.1±111.04 <sup>a</sup>  | 146.8±144.87 <sup>b</sup>  | 150.7±121.55 <sup>b</sup>  | <b>&lt;0.001</b> | 122.4±141.14 <sup>a</sup>  | 135.8±108.87 <sup>b</sup>  | 156.8±129.91 <sup>c</sup>  | <b>&lt;0.001</b> |
| Saturated fat (g)              |                           | 16.6±8.19 <sup>a</sup>     | 23.6±9.72 <sup>b</sup>     | 30.3±12.09 <sup>c</sup>    | <b>&lt;0.001</b> | 15.2±7.78 <sup>a</sup>     | 22.3±7.89 <sup>b</sup>     | 31.8±12.00 <sup>c</sup>    | <b>&lt;0.001</b> |
| Cholesterol (mg)               |                           | 163.9±122.55 <sup>a</sup>  | 248.6±149.07 <sup>b</sup>  | 323.0±179.46 <sup>c</sup>  | <b>&lt;0.001</b> | 139.3±105.73 <sup>a</sup>  | 236.4±126.82 <sup>b</sup>  | 343.7±184.44 <sup>c</sup>  | <b>&lt;0.001</b> |
| Diet quality index total score |                           | 62.4±8.53 <sup>a</sup>     | 62.8±8.48 <sup>a</sup>     | 61.3±7.84 <sup>b</sup>     | <b>&lt;0.001</b> | 62.2±8.91 <sup>a</sup>     | 63.0±8.12 <sup>b</sup>     | 61.3±7.90 <sup>c</sup>     | <b>&lt;0.001</b> |
|                                | DQI variety score         | 17.6±2.89 <sup>a</sup>     | 18.8±1.83 <sup>b</sup>     | 18.9±1.63 <sup>b</sup>     | <b>&lt;0.001</b> | 17.4±2.96 <sup>a</sup>     | 18.8±1.83 <sup>b</sup>     | 18.9±1.69 <sup>b</sup>     | <b>&lt;0.001</b> |
|                                | DQI adequacy score        | 28.0±5.37 <sup>a</sup>     | 30.6±5.18 <sup>b</sup>     | 31.6±4.69 <sup>c</sup>     | <b>&lt;0.001</b> | 27.3±5.75 <sup>a</sup>     | 30.3±4.62 <sup>b</sup>     | 32.0±4.60 <sup>c</sup>     | <b>&lt;0.001</b> |
|                                | DQI moderation score      | 15.2±5.15 <sup>a</sup>     | 12.0±5.06 <sup>b</sup>     | 9.8±5.09 <sup>c</sup>      | <b>&lt;0.001</b> | 15.8±5.00 <sup>a</sup>     | 12.4±4.78 <sup>b</sup>     | 9.3±4.99 <sup>c</sup>      | <b>&lt;0.001</b> |
|                                | DQI overall balance score | 1.67±2.25 <sup>a</sup>     | 1.51±2.14 <sup>b</sup>     | 1.05±1.66 <sup>c</sup>     | <b>&lt;0.001</b> | 1.62±2.20 <sup>a</sup>     | 1.54±2.19 <sup>a</sup>     | 1.10±1.69 <sup>b</sup>     | <b>&lt;0.001</b> |
| Dietary diversity score        |                           | 6.10±1.37 <sup>a</sup>     | 6.87±1.20 <sup>b</sup>     | 7.00±1.19 <sup>c</sup>     | <b>&lt;0.001</b> | 5.95±1.37 <sup>a</sup>     | 6.84±1.18 <sup>b</sup>     | 7.04±1.18 <sup>c</sup>     | <b>&lt;0.001</b> |

p-values calculated with one-way analysis of variance (ANOVA) test.

<sup>a,b,c</sup> Values on the same row not sharing the same superscript letters were significantly different and bold type used for impression (p<0.05). p1: GHGEs, p2: Total water footprint.

Abbreviations: Q: tertiles (Q1 is the lowest and Q3 is the highest); GHGEs: greenhouse gas emission; RDA: recommended dietary allowance; DQI: diet quality index.

Table S3. The contribution of foods to greenhouse gas emission and total water footprint value (n=12527).

| Food                                                           | Greenhouse gas emission |                     |                | Total water footprint |                |
|----------------------------------------------------------------|-------------------------|---------------------|----------------|-----------------------|----------------|
|                                                                | g/day                   | Mean±SD [Median]    | % contribution | Mean±SD [Median]      | % contribution |
| Red meats                                                      | 43.3                    | 1.137±1.10 [0.82]   | 40.1           | 0.588±0.56 [0.425]    | 23.7           |
| Poultry                                                        | 25.2                    | 0.255±0.20 [0.21]   | 2.94           | 0.279±0.22 [0.228]    | 3.6            |
| Sea products                                                   | 14.1                    | 0.324±0.36 [0.25]   | 1.18           | 0.178±0.16 [0.144]    | 0.75           |
| Eggs                                                           | 32.2                    | 0.07±0.07 [0.47]    | 3.4            | 0.107±0.11 [0.072]    | 5.89           |
| Dairy products                                                 | 192.4                   | 0.152±0.16 [0.13]   | 16.9           | 0.112±0.13 [0.084]    | 14.13          |
| Cereals                                                        | 249.2                   | 0.017±0.023 [0.011] | 3.16           | 0.079±0.096 [0.053]   | 16.86          |
| Potato                                                         | 37.2                    | 0.014±0.02 [0.009]  | 0.27           | 0.015±0.02 [0.011]    | 0.33           |
| Nuts and seeds                                                 | 16.3                    | 0.011±0.01 [0.007]  | 0.38           | 0.045±0.06 [0.026]    | 1.78           |
| Legumes                                                        | 25.0                    | 0.03±0.03 [0.028]   | 0.67           | 0.047±0.092 [0.035]   | 1.76           |
| Vegetables                                                     | 215.4                   | 0.017±0.04 [0.009]  | 4.40           | 0.006±0.012 [0.003]   | 1.76           |
| Fruits                                                         | 159.9                   | 0.028±0.05 [0.02]   | 1.82           | 0.037±0.063 [0.023]   | 2.67           |
| Oils                                                           | 22.0                    | 0.017±0.017 [0.01]  | 1.64           | 0.04±0.08 [0.025]     | 4.33           |
| Fats                                                           | 12.9                    | 0.015±0.024 [0.01]  | 0.81           | 0.04±0.051 [0.031]    | 2.51           |
| Sugar and confectioneries                                      | 36.9                    | 0.017±0.046 [0.006] | 1.71           | 0.029±0.08 [0.008]    | 3.36           |
| Soft drink*                                                    | 51.5                    | 0.028±0.08 [0.003]  | 0.62           | 0.034±0.09 [0.005]    | 0.83           |
| Alcoholic beverages*                                           | 6.6                     | 0.167±0.164 [0.117] | 0.11           | 0.086±0.147 [0.016]   | 0.06           |
| Turkish coffee                                                 | 12.9                    | 0.034±0.036 [0.02]  | 0.27           | 0.103±0.109 [0.062]   | 0.88           |
| Black tea*                                                     | 494.0                   | 0.112±0.108 [0.083] | 7.67           | 0.032±0.031 [0.024]   | 2.51           |
| Other coffee (filtered, espresso, etc.) herbal teas, and water | -                       | 0.137±0.68 [0.003]  | 11.45          | 0.112±0.564 [0.0001]  | 10.9           |
| Other (black olive, green olive, flavoring, vanilla, etc.)     | -                       | 0.008±0.01 [0.005]  | 0.3            | 0.038±0.064 [0.026]   | 1.82           |

\*mL/day
